# Supplementary material for: Fast imaging of millimeter-scale areas with beam deflection transmission electron microscopy
Source: PubMed Central journal article supplement (PMC11316758; doi:10.1038/s41467-024-50846-4), 2024-08-10
Supplement: 41467_2024_50846_MOESM3_ESM.pdf [file 41467_2024_50846_MOESM3_ESM.pdf]

## Description of Additional Supplementary Files

### **Supplementary Movie Legends:**

**Supplementary Movie 1.** Aligned images across 55 sections acquired at 120 ms exposure time.

**Supplementary Movie 2.** Aligned images across 20 sections acquired at 40 ms exposure time.

**Supplementary Movie 3.** Screen recording of an acquisition at a peak imaging rate.
